## References

1. Virtue, R. W., Lund, L. O., Phelps, M., Vogel, H. K., Beckwith, H., and Heron, M.: Difluoromethyl 1,1,2-trifluoro-2-chloroethyl ether as an anaesthetic agent: Results with dogs and a preliminary note on observations with man, *Can. Anaesth. Soc. J.* 13: 233, 1966.
2. Dobkin, A. B., Heinrich, R. G., Israel, J. S., Levy, A. A., Neville, J. F., and Ounkasem, K.: Clinical and laboratory evaluation of a new inhalation agent: Compound 347 (CHF<sub>2</sub>-O-CF<sub>2</sub>-CHF Cl), *ANESTHESIOLOGY* 29: 275, 1968.
3. Sugai, N., Shimosato, S., and Etsten, B. E.: Effect of halothane on force-velocity relations and dynamic stiffness of isolated heart muscle, *ANESTHESIOLOGY* 29: 267, 1968.
4. Shimosato, S., Sugai, N., and Etsten, B. E.: The effect of methoxyflurane on the inotropic state of myocardial muscle, *ANESTHESIOLOGY* 30: 506, 1969.
5. Sonnenblick, E. H.: Implications of muscle mechanics in the heart, *Fed. Proc.* 21: 975, 1962.
6. Etsten, B. E., and Shimosato, S.: "Myocardial contractility": Performance of the heart during anesthesia. In Fabian, L. W. (editor): *Anesthesia and the Circulation*. Philadelphia, F. A. Davis Co., 1964, pp. 56-78.
7. Shimosato, S., Shanks, C., and Etsten, B. E.: Effect of methoxyflurane and sympathetic nerve stimulation on myocardial mechanics, *ANESTHESIOLOGY* 29: 538, 1968.
8. Shimosato, S.: Manuscript in preparation.
9. Podolsky, R. J.: The mechanism of muscular contraction, *Amer. J. Med.* 39: 708, 1961.
10. Buccino, R. A., Sonnenblick, E. H., Spann, J. F., Jr., Friedman, W. F., and Braunwald, E.: Interactions between changes in the intensity and duration of the active state in the characterization of inotropic stimuli on heart muscle, *Circ. Res.* 21: 857, 1967.
11. Nayler, W. G.: Calcium exchange in cardiac muscle: A basic mechanism of d.ug action, *Amer. Heart J.* 73: 379, 1967.
12. Weber, A.: Energized calcium transport and relaxing factors. In Sanadi, D. R. (editor): *Current Topics in Bioenergetics*. Vol. 1. New York, Academic Press, 1966, p. 292.

## Drugs

**BRONCHODILATORS** In a double-blind crossover trial of responses of asthmatic patients to isoproterenol and metaproterenol, a significantly greater duration of action was found with metaproterenol. Fewer side effects appeared than after the administration of isoproterenol. (Holmes, T. H.: *A Comparative Clinical Trial of Metaproterenol and Isoproterenol as Bronchodilator Aerosols*, *Clin. Pharmacol. and Ther.* 9: 615 (Sept.) 1968.)

**PLV-2 (OCTAPRESSIN)** The systemic and renal hemodynamic effects of PLV-2 were studied in 11 patients with hypotension of decompensated hepatic cirrhosis. Intravenous infusion of PLV-2 resulted in dose-related increases in arterial pressure and systemic vascular resistance. Cardiac output and heart rate fell slightly, with no change in venous pressure. Low doses of PLV-2 (.004 to .02 units per minute) produced an increase in renal blood flow, a decrease in renal vascular resistance, and an increase in the renal fraction of cardiac output of from 9 to 14 per cent. Renal blood flow was somewhat lower at high than at low doses of PLV-2, but was still higher than predrug control values. No evidence of tachyphylaxis was seen during infusions lasting up to four hours. In hypotensive patients, PLV-2 produces renal vasodilatation and extrarenal vasoconstriction, resulting in redistribution of blood flow to the kidney. (Cohen, J. N., and others: *Systemic Vasoconstrictor and Renal Vasodilator Effects of PLV-2 (Octapressin) in Man*, *Circulation* 38: 151 (July) 1968.)
